# Supplementary material for: Phosphate availability regulates ethylene biosynthesis gene expression and protein accumulation in white clover (Trifolium repens L.) roots
Source: Oxford University Press journal article supplement (doi:10.1042/bsr20160148), 2016-10-14
Supplement: bsr036e411add.pdf [file bsr036e411add.pdf]

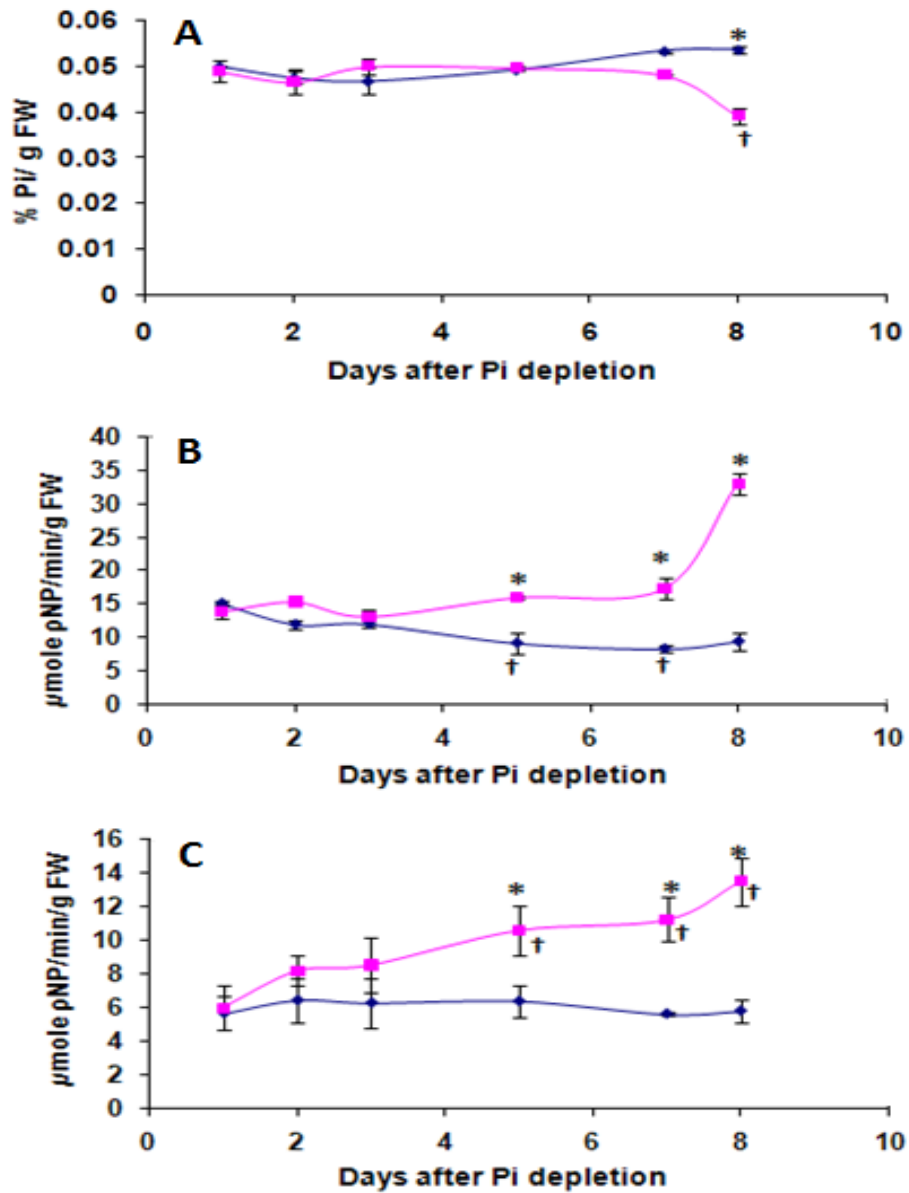

**Figure S1 Cellular effects of Pi supply in roots of wild-type white clover**

The effects of P treatment [1 mM Pi, P+ (-◆-); 10 μM Pi, P- (-■-)] on total leaf Pi content per gram fresh weight (% Pi/g FW) (A), acid phosphatase activity (μmole pNP/min/g FW) in the soluble (B) and cell-wall-enriched fractions (C) in rooted stolon cuttings of genotype 10F, cv. Grasslands Challenge. Values are means ± SE, n = 3. \* indicates significant differences between treatments (P ≤ 0.05); † indicates significant differences within a treatment from day 1 (P ≤ 0.05).

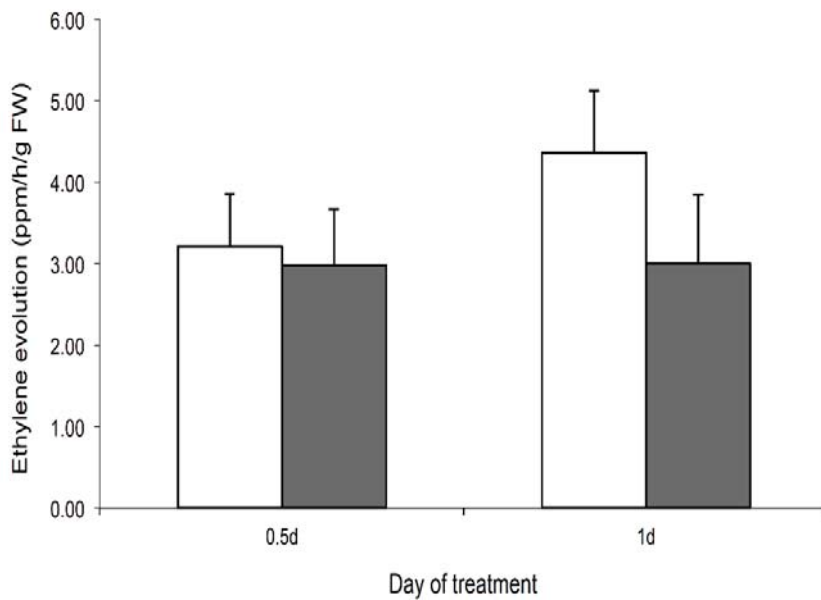

**Figure S2 Ethylene evolution from whole roots of white clover in response to Pi supply**

Ethylene evolution (expressed as ppm/hr/g FW) from whole roots of white clover nodal explants maintained hydroponically in half-strength Hoagland's media containing either 1 mM Pi (clear bars) or 10 μM Pi (shaded bars) for the time intervals listed. Values are means, ± SE, of three biological replicates where the ethylene production of six pooled nodal roots (primary and lateral roots combined) represents one biological replicate.

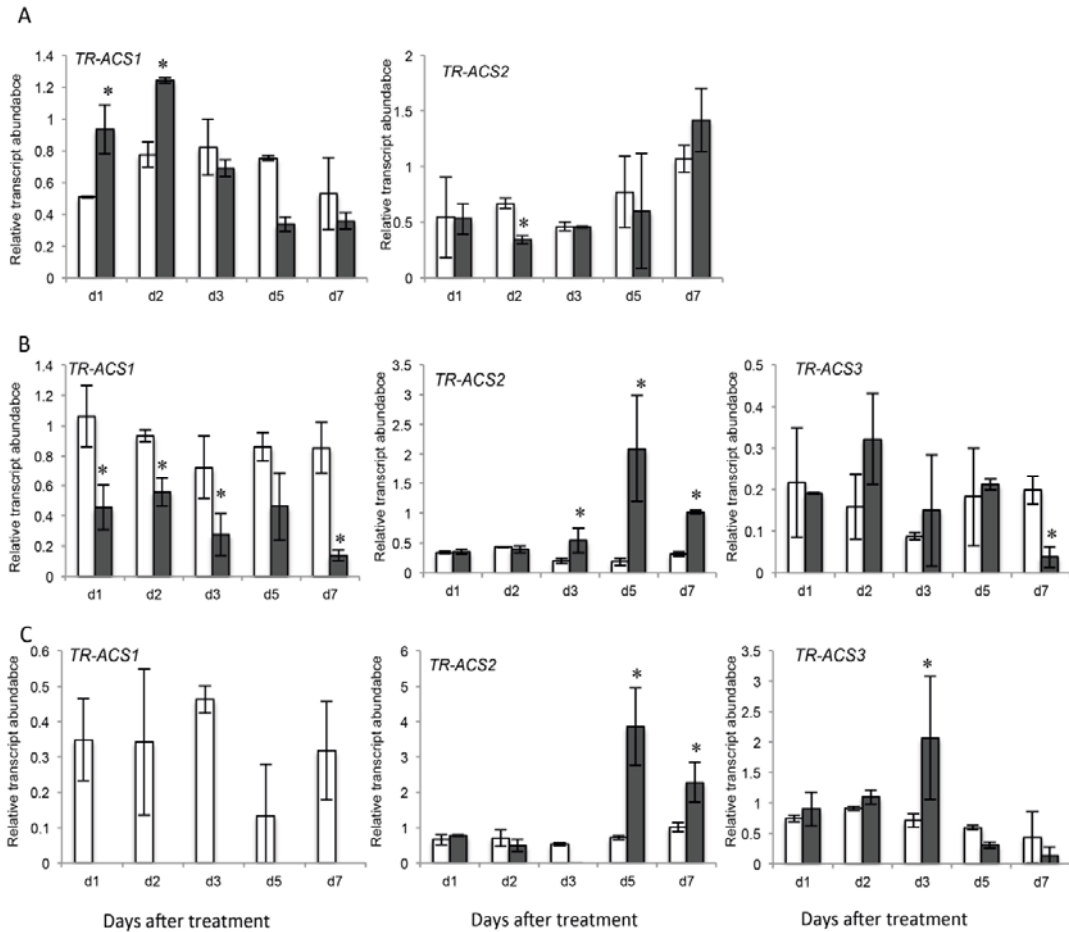

**Figure S3 Changes in transcript abundance of the *TR-ACS* gene family in roots in response to Pi supply**

Relative transcript abundance of *TR-ACS1*, *TR-ACS2* and *TR-ACS3*, as indicated in the EZ (A), VL (B) and MR (C) regions of the primary roots of nodal explants maintained hydroponically in half-strength Hoagland's media containing either 1 mM Pi (clear bars) or 10  $\mu$ M Pi (shaded bars) for the time intervals indicated. Relative transcript abundance was determined by qRT-PCR and transcription was normalized against two internal reference genes, *TR- $\beta$ -actin* and *TR-GAPDH*. Values are means  $\pm$  SE, for two biological replicates each of which was derived from means of three technical replicates. \* indicates significant differences between the 1 mM Pi and the 10  $\mu$ M Pi treatments ( $P \leq 0.05$ ).

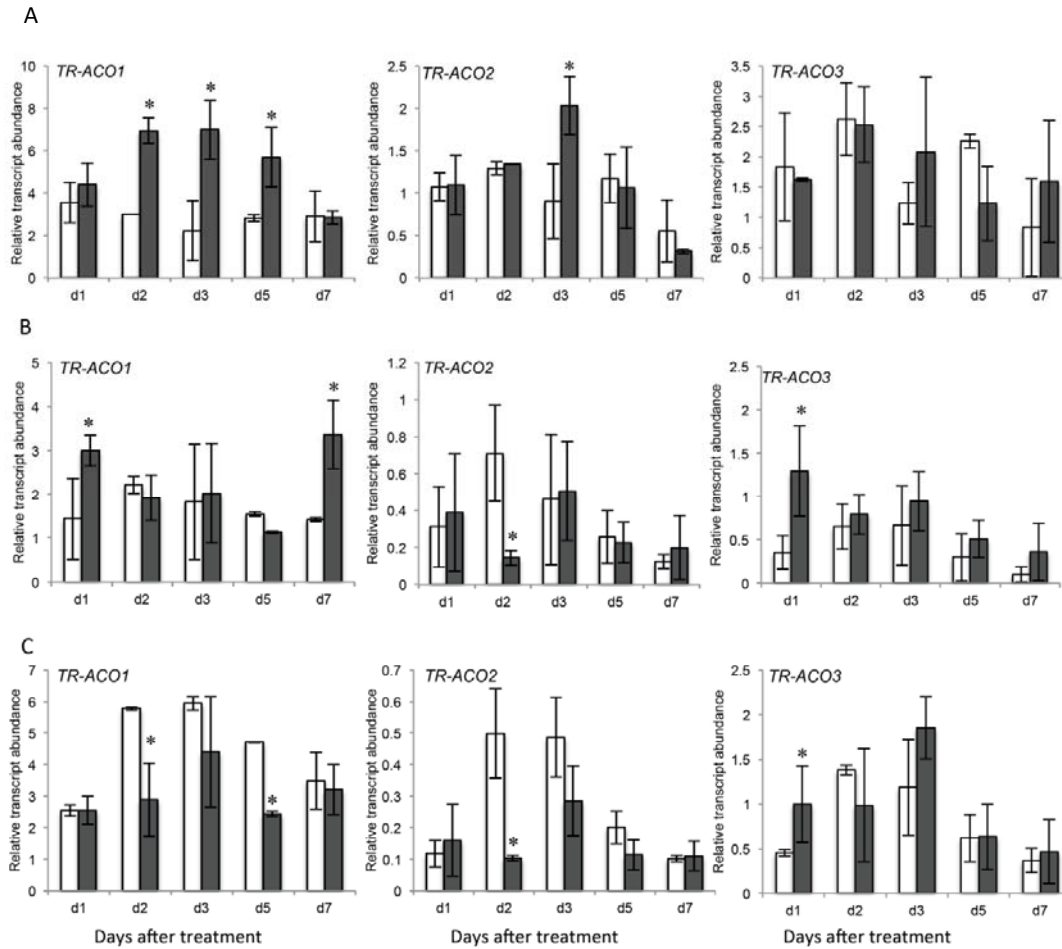

**Figure S4 Changes in transcript abundance of the *TR-ACO* gene family in roots in response to Pi supply**

Relative transcript abundance of *TR-ACO1*, *TR-ACO2* and *TR-ACO3*, as indicated in the EZ (A), VL (B) and MR (C) regions of the primary roots of nodal explants maintained hydroponically in half-strength Hoagland's media containing either 1 mM Pi (clear bars) or 10  $\mu$ M Pi (shaded bars) for the time intervals indicated. Relative transcript abundance was determined by qRT-PCR and transcription was normalized against two internal reference genes, *TR- $\beta$ -actin* and *TR-GAPDH*. Values are means  $\pm$  SE, for two biological replicates each of which was derived from means of three technical replicates. \* indicates significant differences between the 1 mM Pi and the 10  $\mu$ M Pi treatments ( $P \leq 0.05$ ).

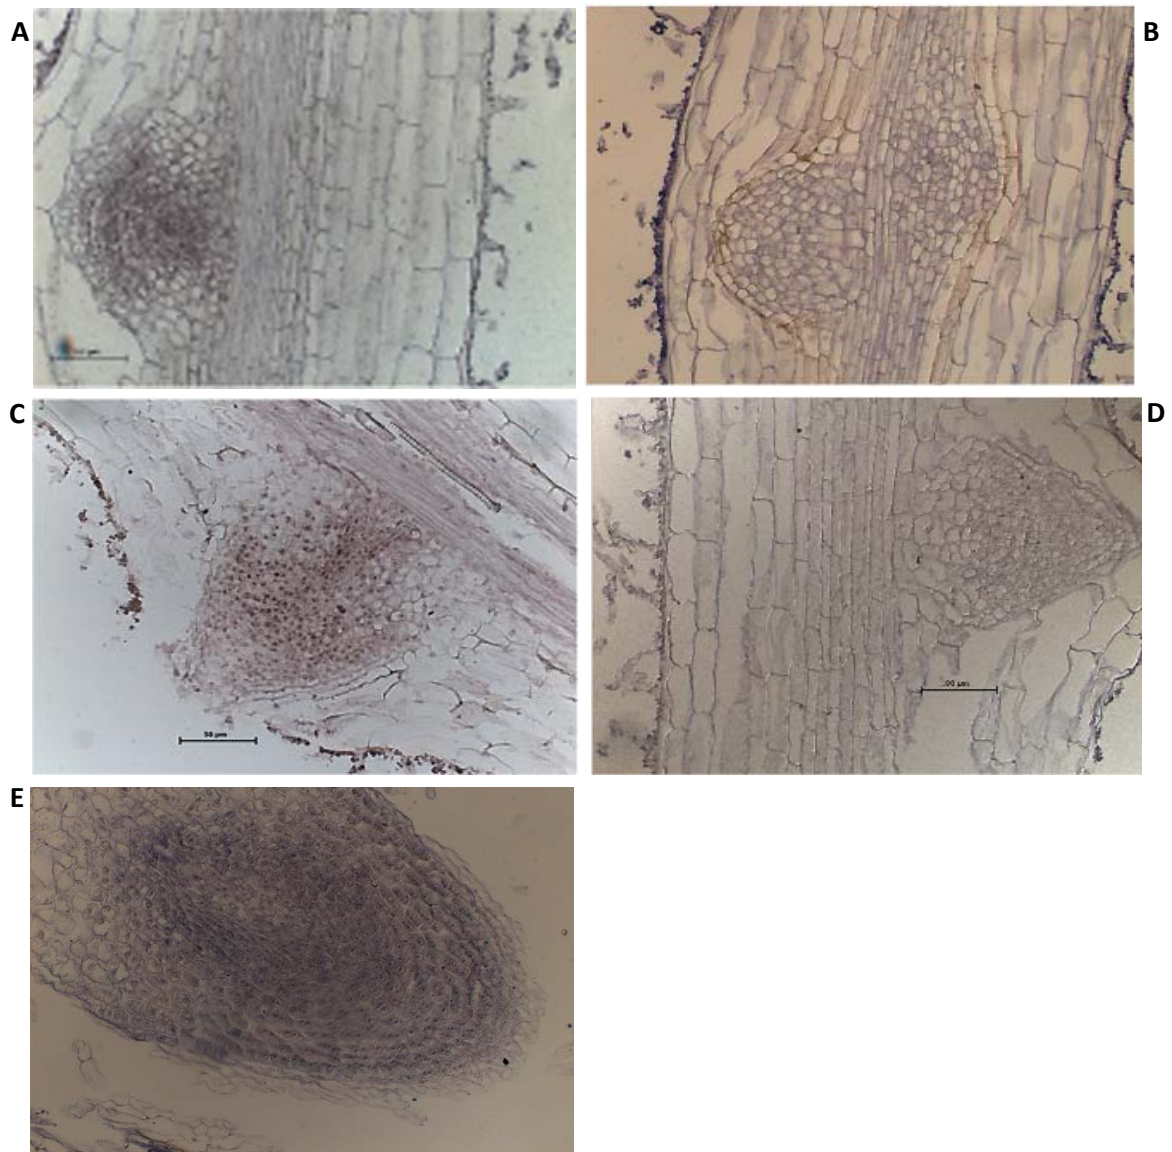

**Figure S5 Localization of *TR-ACO1* transcripts in Pi-sufficient roots using *in situ* hybridization**

Localization of *TR-ACO1* transcripts in Pi-sufficient roots of white clover. A,C, localization in lateral root primordia at different developmental stages in the VL region revealed using the antisense *TR-ACO1* probe; B,D, localization in lateral root primordia at different developmental stages in the VL region revealed using the sense *TR-ACO1* probe; E, localization in the primary root tip using the antisense *TR-ACO1* probe. The bars represent 50  $\mu\text{m}$ .

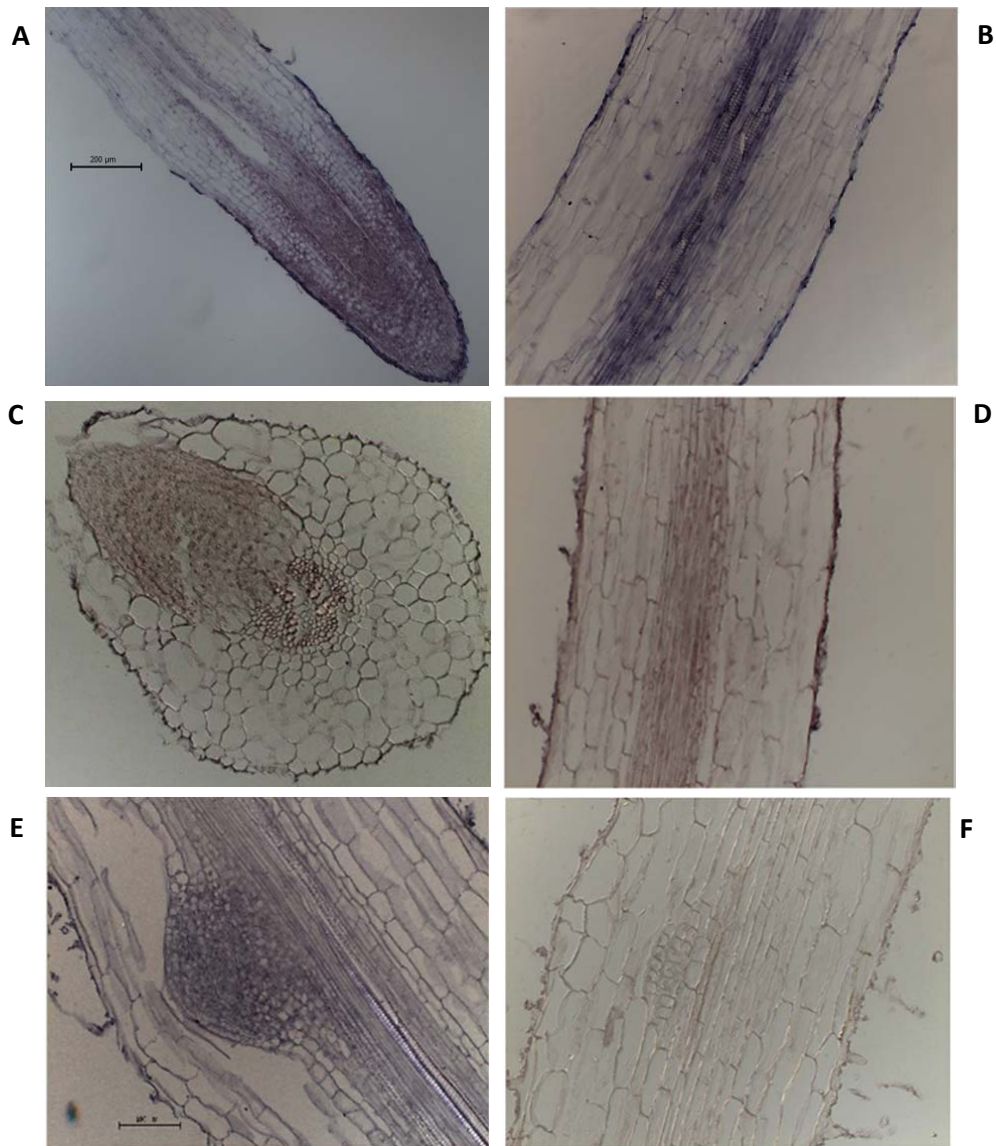

**Figure S6** Localization of *TR-ACO2* and *TR-ACO3* transcripts in Pi-sufficient roots using *in situ* hybridization

Localization of *TR-ACO2* transcripts in the primary root tip (A), and in the vascular tissue in the VL (B) revealed using the anti-sense *TR-ACO2* probe. Localisation of *TR-ACO2* transcripts in the lateral root primordia (C) and in the vascular tissue (D) in the VL revealed using the sense *TR-ACO2* probe. Localization of *TR-ACO3* transcripts in the lateral root primordia in Pi-sufficient roots of white clover in the VL revealed using the anti-sense *TR-ACO3* probe (E) or the sense *TR-ACO3* probe (F). The bars represent 50 µm.

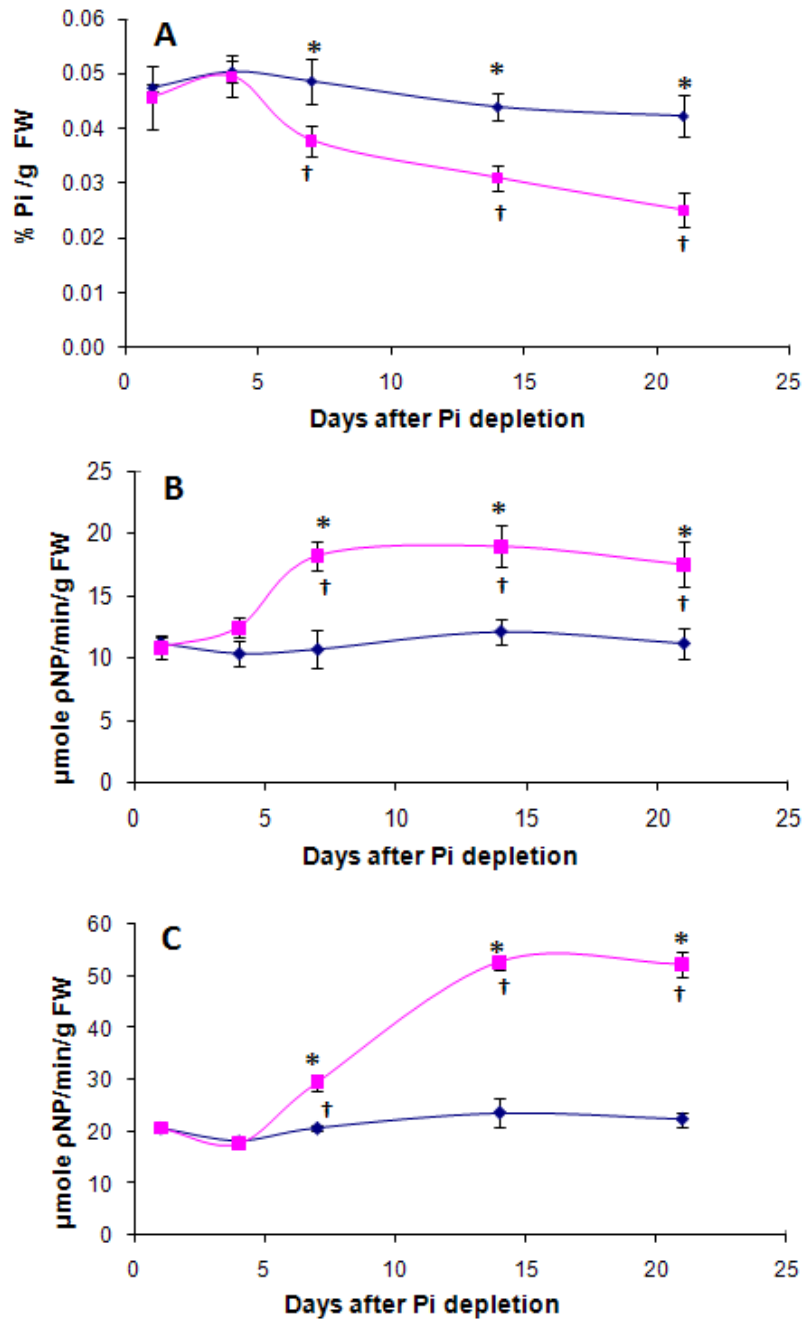

**Figure S7 Cellular effects of Pi supply in roots of the *TR-ACO1p::mGFP-ER* white clover (line TR2-1)**

The effects of Pi treatment [1 mM Pi, P+ (-♦-); 10 μM Pi, P- (-■-)] on total leaf Pi content (A), acid phosphatase activity in the cell-wall-enriched (B) and soluble fractions (C) in the transgenic white clover (*TR-ACO1p::mGFP-ER*) line TR2-1. Values are means ± SE, n = 3 (A), n = 4 (B,C) \* indicates significant differences between treatments (P ≤ 0.05); † indicates significant differences within a treatment from day 1 (P ≤ 0.05).

**Table S1** List of primer sequences used in this study

| <b>Gene</b>                                       | <b>Sense</b>             | <b>Antisense</b>            |
|---------------------------------------------------|--------------------------|-----------------------------|
| Degenerate primers used for cloning <i>TR-PT1</i> |                          |                             |
| DegTR-PT1                                         | CAATTGTGATAGCWGGAATGGG   | CCTGCAGCAGCWGAGATTC         |
| Sequences of primers used for qRT-PCR             |                          |                             |
| <i>TR-<math>\beta</math>-actin</i>                | CGTATGAGCAAGGAGATCACTG   | CATCTGCTGGAAGGTGCT          |
| <i>TR- GAPDH</i>                                  | TCCAGTATTGAACGGTAAATTGAC | TCTGATTCCTCCTTGATAGCAG      |
| <i>TR-ACS1</i>                                    | AGGTTTCGATCGAGATTTGA     | TTGGTTCTGTCCATAACTGTG       |
| <i>TR-ACS2</i>                                    | GAGAACCGGTGTTGAGATT      | GACTTTAAGGTTGCGGTCT         |
| <i>TR-ACS3</i>                                    | TGTTCTGATTTGTGTTGGA      | TGTTCTAGAGGGTTTGATG         |
| <i>TR-ACO1</i>                                    | GTGTTGATGTGGACCAGTAG     | CCAAACCAAACACTAATAATCGC     |
| <i>TR-ACO2</i>                                    | CTTGTAAGGTCTCCGAGCAC     | GAGGAACATCTACCCATTTACCAT    |
| <i>TR-ACO3</i>                                    | AGCATCATTCTACAACCCTGG    | CAAACACAAATTTAGGATACACATTGG |
| <i>TR-PT1</i>                                     | GAATGCGAAACAGGCTACTG     | CTGAACAAGCCATACTGATTTCT     |



**Table S2** Accession numbers of genes examined in this study

| Gene Name      | GenBank Accession |
|----------------|-------------------|
| <i>TR-ACS1</i> | KM881530          |
| <i>TR-ACS2</i> | KM881531          |
| <i>TR-ACS3</i> | KM881532          |
| <i>TR-ACO1</i> | DQ112347          |
| <i>TR-ACO2</i> | DQ112348          |
| <i>TR-ACO3</i> | DQ112349          |
| <i>TR-PT1</i>  | KF022212          |
